# Supplementary material
Source: PubMed Central journal article supplement (PMC2586137)
Supplement: 97320630003047S1.pdf [file 97320630003047S1.pdf]

### Supplementary material

| Condition, susceptibility to                                    | Gene symbol                 | OMIM #        | location     |
|-----------------------------------------------------------------|-----------------------------|---------------|--------------|
| Nystagmus-2, autosomal dominant                                 | NYS2, NYSA                  | <u>164100</u> | 6p12         |
| Epilepsy, juvenile myoclonic                                    | EJM3                        | <u>608816</u> | 6p21         |
| Migraine with or without aura                                   | MGR3                        | <u>607498</u> | 6p21.1-p12.2 |
| Ankylosing spondylitis                                          | AS                          | 106300        | 6p21.3       |
| Creutzfeldt-Jakob disease, variant, resistance                  | HLA-DQB1                    | <u>604305</u> | 6p21.3       |
| Deafness, autosomal dominant                                    | COL11A2,STL3, DFNA13        | <u>120290</u> | 6p21.3       |
| Dementia, vascular                                              | TNF, TNFA                   | <u>191160</u> | 6p21.3       |
| Malaria, cerebral                                               | TNF, TNFA                   | <u>191160</u> | 6p21.3       |
| Migraine without aura                                           | TNF, TNFA                   | <u>191160</u> | 6p21.3       |
| Multiple sclerosis                                              | HLA-DQB1                    | <u>604305</u> | 6p21.3       |
| Multiple sclerosis                                              | HLA-DR1B                    | <u>142857</u> | 6p21.3       |
| Myasthenia gravis with thymus hyperplasia                       | MYAS1                       | <u>607085</u> | 6p21.3       |
| Autism                                                          | GLO1                        | <u>138750</u> | 6p21.3-p21.2 |
| Dyslexia                                                        | KIAA0319, DYX2, DYLX2, DLX2 | <u>609269</u> | 6p22.2       |
| Epilepsy, myoclonic, Lafora type                                | NHLRC1,EPM2A, EPM2B         | <u>608072</u> | 6p22.3       |
| Schizophrenia                                                   | DTNBP1, HPS7                | <u>607145</u> | 6p22.3       |
| Maple syrup urine disease-Ib                                    | BCKDHB, E1B                 | <u>248611</u> | 6p22-p21     |
| Spinocerebellar ataxia-1                                        | ATXN1, ATX1, SCA1           | <u>601556</u> | 6p23         |
| Spinocerebellar ataxia with blindness and deafness              | SCABD                       | <u>271250</u> | 6p23-p21     |
| Attention deficit-hyperactivity disorder                        | ADHD3                       | <u>608905</u> | 6q12         |
| Deafness, autosomal dominant & recessive                        | MYO6, DFNA22, DFNB37        | <u>600970</u> | 6q13         |
| Multiple sclerosis                                              | CD24                        | <u>600074</u> | 6q21         |
| Muscular dystrophy, congenital merosin-deficient                | LAMA2, LAMM                 | <u>156225</u> | 6q22-q23     |
| Muscular dystrophy, congenital, due to partial LAMA2 deficiency | LAMA2, LAMM                 | <u>156225</u> | 6q22-q23     |
| Febrile convulsions, familial                                   | 38753                       | <u>609255</u> | 6q22-q24     |
| Refsum disease                                                  | PEX7, RCDP1                 | <u>601757</u> | 6q22-q24     |
| Deafness, autosomal dominant                                    | EYA4,DFNA10, CMD1J          | <u>603550</u> | 6q23         |
| Schizophrenia                                                   | TAAR6,TRAR4, SCZD5          | <u>608923</u> | 6q23.2       |
| Zellweger synd., complementation group                          | PEX3                        | <u>603164</u> | 6q23-q24     |
| Epilepsy, myoclonic, Lafora type                                | EPM2A, MELF, EPM2           | <u>607566</u> | 6q24         |
| Migraine                                                        | ESR1, ESR                   | <u>133430</u> | 6q25.1       |
| Parkinson disease, juvenile-2                                   | PRKN, PARK2, PDJ            | <u>602544</u> | 6q25.2-q27   |
| Deafness, autosomal recessive                                   | DFNB38                      | <u>608219</u> | 6q26-q27     |
| Huntington disease-like-4                                       | TBP, SCA17                  | <u>600075</u> | 6q27         |
| Parkinson disease                                               | TBP, SCA17                  | <u>600075</u> | 6q27         |

**Table 1:** Select genes and Diseases associated with chromosome 6. (From: MHC sequencing consortium, The complete sequence and gene map of a human major histocompatibility complex, Nature, 401, 921-923, 1999; OMIM:

<http://www.ncbi.nlm.nih.gov/entrez/query.fcgi?db=OMIM>; OMIM Morbid map:

<http://www.ncbi.nlm.nih.gov/Omim/getmorbid.cgi>)
